# Supplementary material for: Efficient multitool/multiplex gene engineering with TALE-BE
Source: Front Bioeng Biotechnol. 2022 Nov 10;10:1033669. doi: 10.3389/fbioe.2022.1033669 (PMC9684181; doi:10.3389/fbioe.2022.1033669)
Supplement: Supplementary file 2 [file Table3.xlsx]

## Sheet: Table S3
Table S3. Sequences of individual ssODN used to asses effect of spacer length on editing
Name	Sequence
TCGA-1	GAGATCATGTCCTAACCCTGATCCTCTTGTCCCACAGATATCCAGAACCCTCTAAGAAGTTCCTGCTTCGATGAATGTGGTTAGAGACAAAACAGTGACCCTGCCGTGTACCAGCTGAGAGACTCTAAATCCAGTGACAAGTCTG
TCGA-2	GAGATCATGTCCTAACCCTGATCCTCTTGTCCCACAGATATCCAGAACCCTCTAAGAAGTTCCTGCTATCGAGAATGTGGTTAGAGACAAAACCTTGACCCTGCCGTGTACCAGCTGAGAGACTCTAAATCCAGTGACAAGTCTG
TCGA-3	GAGATCATGTCCTAACCCTGATCCTCTTGTCCCACAGATATCCAGAACCCTCTAAGAAGTTCCTGCTGATCAGAATGTGGTTAGAGACAAAACGATGACCCTGCCGTGTACCAGCTGAGAGACTCTAAATCCAGTGACAAGTCTG
TCGA-4	GAGATCATGTCCTAACCCTGATCCTCTTGTCCCACAGATATCCAGAACCCTCTAAGAAGTTCCTGCTAGATCGAATGTGGTTAGAGACAAAACGGTGACCCTGCCGTGTACCAGCTGAGAGACTCTAAATCCAGTGACAAGTCTG
TCGA-5	GAGATCATGTCCTAACCCTGATCCTCTTGTCCCACAGATATCCAGAACCCTCTAAGAAGTTCCTGCTTCGATATGAATGTGGTTAGAGACAAAACTCTGACCCTGCCGTGTACCAGCTGAGAGACTCTAAATCCAGTGACAAGTCTG
TCGA-6	GAGATCATGTCCTAACCCTGATCCTCTTGTCCCACAGATATCCAGAACCCTCTAAGAAGTTCCTGCTAATCGATGAATGTGGTTAGAGACAAAAGACTGACCCTGCCGTGTACCAGCTGAGAGACTCTAAATCCAGTGACAAGTCTG
TCGA-7	GAGATCATGTCCTAACCCTGATCCTCTTGTCCCACAGATATCCAGAACCCTCTAAGAAGTTCCTGCTGATATCAGAATGTGGTTAGAGACAAAAGAGTGACCCTGCCGTGTACCAGCTGAGAGACTCTAAATCCAGTGACAAGTCTG
TCGA-8	GAGATCATGTCCTAACCCTGATCCTCTTGTCCCACAGATATCCAGAACCCTCTAAGAAGTTCCTGCTTCGAtattaGAATGTGGTTAGAGACAAAAGCTTGACCCTGCCGTGTACCAGCTGAGAGACTCTAAATCCAGTGACAAGTCTG
TCGA-9	GAGATCATGTCCTAACCCTGATCCTCTTGTCCCACAGATATCCAGAACCCTCTAAGAAGTTCCTGCTtaTCGAtatGAATGTGGTTAGAGACAAAAGGATGACCCTGCCGTGTACCAGCTGAGAGACTCTAAATCCAGTGACAAGTCTG
TCGA-10	GAGATCATGTCCTAACCCTGATCCTCTTGTCCCACAGATATCCAGAACCCTCTAAGAAGTTCCTGCTattaTCGAtGAATGTGGTTAGAGACAAAAGGGTGACCCTGCCGTGTACCAGCTGAGAGACTCTAAATCCAGTGACAAGTCTG
TCGA-11	GAGATCATGTCCTAACCCTGATCCTCTTGTCCCACAGATATCCAGAACCCTCTAAGAAGTTCCTGCTAtattaTCGGAATGTGGTTAGAGACAAAAGTCTGACCCTGCCGTGTACCAGCTGAGAGACTCTAAATCCAGTGACAAGTCTG
TCGA-12	GAGATCATGTCCTAACCCTGATCCTCTTGTCCCACAGATATCCAGAACCCTCTAAGAAGTTCCTGCTTCGAtatttaaGAATGTGGTTAGAGACAAAATCCTGACCCTGCCGTGTACCAGCTGAGAGACTCTAAATCCAGTGACAAGTCTG
TCGA-13	GAGATCATGTCCTAACCCTGATCCTCTTGTCCCACAGATATCCAGAACCCTCTAAGAAGTTCCTGCTaaTCGAtatttGAATGTGGTTAGAGACAAAATGCTGACCCTGCCGTGTACCAGCTGAGAGACTCTAAATCCAGTGACAAGTCTG
TCGA-14	GAGATCATGTCCTAACCCTGATCCTCTTGTCCCACAGATATCCAGAACCCTCTAAGAAGTTCCTGCTttaaTCGAtatGAATGTGGTTAGAGACAAACAAGTGACCCTGCCGTGTACCAGCTGAGAGACTCTAAATCCAGTGACAAGTCTG
TCGA-15	GAGATCATGTCCTAACCCTGATCCTCTTGTCCCACAGATATCCAGAACCCTCTAAGAAGTTCCTGCTatttaaTCGAtGAATGTGGTTAGAGACAAACACCTGACCCTGCCGTGTACCAGCTGAGAGACTCTAAATCCAGTGACAAGTCTG
TCGA-16	GAGATCATGTCCTAACCCTGATCCTCTTGTCCCACAGATATCCAGAACCCTCTAAGAAGTTCCTGCTAtatttaaTCGGAATGTGGTTAGAGACAAACAGATGACCCTGCCGTGTACCAGCTGAGAGACTCTAAATCCAGTGACAAGTCTG
TCGA-17	GAGATCATGTCCTAACCCTGATCCTCTTGTCCCACAGATATCCAGAACCCTCTAAGAAGTTCCTGCTTCGAtaattataaGAATGTGGTTAGAGACAAACAGGTGACCCTGCCGTGTACCAGCTGAGAGACTCTAAATCCAGTGACAAGTCTG
TCGA-18	GAGATCATGTCCTAACCCTGATCCTCTTGTCCCACAGATATCCAGAACCCTCTAAGAAGTTCCTGCTaaTCGAtaattatGAATGTGGTTAGAGACAAACCATTGACCCTGCCGTGTACCAGCTGAGAGACTCTAAATCCAGTGACAAGTCTG
TCGA-19	GAGATCATGTCCTAACCCTGATCCTCTTGTCCCACAGATATCCAGAACCCTCTAAGAAGTTCCTGCTataaTCGAtaattGAATGTGGTTAGAGACAAACCGTTGACCCTGCCGTGTACCAGCTGAGAGACTCTAAATCCAGTGACAAGTCTG
TCGA-20	GAGATCATGTCCTAACCCTGATCCTCTTGTCCCACAGATATCCAGAACCCTCTAAGAAGTTCCTGCTttataaTCGAtaaGAATGTGGTTAGAGACAAACGCATGACCCTGCCGTGTACCAGCTGAGAGACTCTAAATCCAGTGACAAGTCTG
TCGA-21	GAGATCATGTCCTAACCCTGATCCTCTTGTCCCACAGATATCCAGAACCCTCTAAGAAGTTCCTGCTaattataaTCGAtGAATGTGGTTAGAGACAAACTCGTGACCCTGCCGTGTACCAGCTGAGAGACTCTAAATCCAGTGACAAGTCTG
TCGA-22	GAGATCATGTCCTAACCCTGATCCTCTTGTCCCACAGATATCCAGAACCCTCTAAGAAGTTCCTGCTAtaattataaTCGGAATGTGGTTAGAGACAAACTGGTGACCCTGCCGTGTACCAGCTGAGAGACTCTAAATCCAGTGACAAGTCTG
TCGA-23	GAGATCATGTCCTAACCCTGATCCTCTTGTCCCACAGATATCCAGAACCCTCTAAGAAGTTCCTGCTTCGAttataattaaaGAATGTGGTTAGAGACAAACTTCTGACCCTGCCGTGTACCAGCTGAGAGACTCTAAATCCAGTGACAAGTCTG
TCGA-24	GAGATCATGTCCTAACCCTGATCCTCTTGTCCCACAGATATCCAGAACCCTCTAAGAAGTTCCTGCTaaTCGAttataattaGAATGTGGTTAGAGACAAAGAACTGACCCTGCCGTGTACCAGCTGAGAGACTCTAAATCCAGTGACAAGTCTG
TCGA-25	GAGATCATGTCCTAACCCTGATCCTCTTGTCCCACAGATATCCAGAACCCTCTAAGAAGTTCCTGCTtaaaTCGAttataatGAATGTGGTTAGAGACAAAGAAGTGACCCTGCCGTGTACCAGCTGAGAGACTCTAAATCCAGTGACAAGTCTG
TCGA-26	GAGATCATGTCCTAACCCTGATCCTCTTGTCCCACAGATATCCAGAACCCTCTAAGAAGTTCCTGCTattaaaTCGAttataGAATGTGGTTAGAGACAAAGACATGACCCTGCCGTGTACCAGCTGAGAGACTCTAAATCCAGTGACAAGTCTG
TCGA-27	GAGATCATGTCCTAACCCTGATCCTCTTGTCCCACAGATATCCAGAACCCTCTAAGAAGTTCCTGCTtaattaaaTCGAttaGAATGTGGTTAGAGACAAAGACTTGACCCTGCCGTGTACCAGCTGAGAGACTCTAAATCCAGTGACAAGTCTG
TCGA-28	GAGATCATGTCCTAACCCTGATCCTCTTGTCCCACAGATATCCAGAACCCTCTAAGAAGTTCCTGCTtataattaaaTCGAtGAATGTGGTTAGAGACAAAGAGATGACCCTGCCGTGTACCAGCTGAGAGACTCTAAATCCAGTGACAAGTCTG
TCGA-29	GAGATCATGTCCTAACCCTGATCCTCTTGTCCCACAGATATCCAGAACCCTCTAAGAAGTTCCTGCTAttataattaaaTCGGAATGTGGTTAGAGACAAAGAGTTGACCCTGCCGTGTACCAGCTGAGAGACTCTAAATCCAGTGACAAGTCTG
TCGA-30	GAGATCATGTCCTAACCCTGATCCTCTTGTCCCACAGATATCCAGAACCCTCTAAGAAGTTCCTGCTTCGAtattattaaattaGAATGTGGTTAGAGACAAAGATCTGACCCTGCCGTGTACCAGCTGAGAGACTCTAAATCCAGTGACAAGTCTG
TCGA-31	GAGATCATGTCCTAACCCTGATCCTCTTGTCCCACAGATATCCAGAACCCTCTAAGAAGTTCCTGCTtaTCGAtattattaaatGAATGTGGTTAGAGACAAAGCTGTGACCCTGCCGTGTACCAGCTGAGAGACTCTAAATCCAGTGACAAGTCTG
TCGA-32	GAGATCATGTCCTAACCCTGATCCTCTTGTCCCACAGATATCCAGAACCCTCTAAGAAGTTCCTGCTattaTCGAtattattaaGAATGTGGTTAGAGACAAAGGAATGACCCTGCCGTGTACCAGCTGAGAGACTCTAAATCCAGTGACAAGTCTG
TCGA-33	GAGATCATGTCCTAACCCTGATCCTCTTGTCCCACAGATATCCAGAACCCTCTAAGAAGTTCCTGCTaaattaTCGAtattattGAATGTGGTTAGAGACAAAGGAGTGACCCTGCCGTGTACCAGCTGAGAGACTCTAAATCCAGTGACAAGTCTG
TCGA-34	GAGATCATGTCCTAACCCTGATCCTCTTGTCCCACAGATATCCAGAACCCTCTAAGAAGTTCCTGCTttaaattaTCGAtattaGAATGTGGTTAGAGACAAAGGGATGACCCTGCCGTGTACCAGCTGAGAGACTCTAAATCCAGTGACAAGTCTG
TCGA-35	GAGATCATGTCCTAACCCTGATCCTCTTGTCCCACAGATATCCAGAACCCTCTAAGAAGTTCCTGCTtattaaattaTCGAtatGAATGTGGTTAGAGACAAAGGGTTGACCCTGCCGTGTACCAGCTGAGAGACTCTAAATCCAGTGACAAGTCTG
TCGA-36	GAGATCATGTCCTAACCCTGATCCTCTTGTCCCACAGATATCCAGAACCCTCTAAGAAGTTCCTGCTattattaaattaTCGAtGAATGTGGTTAGAGACAAAGGTCTGACCCTGCCGTGTACCAGCTGAGAGACTCTAAATCCAGTGACAAGTCTG
TCGA-37	GAGATCATGTCCTAACCCTGATCCTCTTGTCCCACAGATATCCAGAACCCTCTAAGAAGTTCCTGCTAtattattaaattaTCGGAATGTGGTTAGAGACAAAGGTGTGACCCTGCCGTGTACCAGCTGAGAGACTCTAAATCCAGTGACAAGTCTG
TCGA-38	GAGATCATGTCCTAACCCTGATCCTCTTGTCCCACAGATATCCAGAACCCTCTAAGAAGTTCCTGCTTCGAtataattatattataGAATGTGGTTAGAGACAAAGTACTGACCCTGCCGTGTACCAGCTGAGAGACTCTAAATCCAGTGACAAGTCTG
TCGA-39	GAGATCATGTCCTAACCCTGATCCTCTTGTCCCACAGATATCCAGAACCCTCTAAGAAGTTCCTGCTtaTCGAtataattatattaGAATGTGGTTAGAGACAAAGTCGTGACCCTGCCGTGTACCAGCTGAGAGACTCTAAATCCAGTGACAAGTCTG
TCGA-40	GAGATCATGTCCTAACCCTGATCCTCTTGTCCCACAGATATCCAGAACCCTCTAAGAAGTTCCTGCTtataTCGAtataattatatGAATGTGGTTAGAGACAAATACCTGACCCTGCCGTGTACCAGCTGAGAGACTCTAAATCCAGTGACAAGTCTG
TCGA-41	GAGATCATGTCCTAACCCTGATCCTCTTGTCCCACAGATATCCAGAACCCTCTAAGAAGTTCCTGCTattataTCGAtataattatGAATGTGGTTAGAGACAAATCGATGACCCTGCCGTGTACCAGCTGAGAGACTCTAAATCCAGTGACAAGTCTG
TCGA-42	GAGATCATGTCCTAACCCTGATCCTCTTGTCCCACAGATATCCAGAACCCTCTAAGAAGTTCCTGCTatattataTCGAtataattGAATGTGGTTAGAGACAAATCTCTGACCCTGCCGTGTACCAGCTGAGAGACTCTAAATCCAGTGACAAGTCTG
TCGA-43	GAGATCATGTCCTAACCCTGATCCTCTTGTCCCACAGATATCCAGAACCCTCTAAGAAGTTCCTGCTttatattataTCGAtataaGAATGTGGTTAGAGACAAATTCCTGACCCTGCCGTGTACCAGCTGAGAGACTCTAAATCCAGTGACAAGTCTG
TCGA-44	GAGATCATGTCCTAACCCTGATCCTCTTGTCCCACAGATATCCAGAACCCTCTAAGAAGTTCCTGCTaattatattataTCGAtatGAATGTGGTTAGAGACAAATTGCTGACCCTGCCGTGTACCAGCTGAGAGACTCTAAATCCAGTGACAAGTCTG
TCGA-45	GAGATCATGTCCTAACCCTGATCCTCTTGTCCCACAGATATCCAGAACCCTCTAAGAAGTTCCTGCTataattatattataTCGAtGAATGTGGTTAGAGACAAATTGGTGACCCTGCCGTGTACCAGCTGAGAGACTCTAAATCCAGTGACAAGTCTG
TCGA-46	GAGATCATGTCCTAACCCTGATCCTCTTGTCCCACAGATATCCAGAACCCTCTAAGAAGTTCCTGCTAtataattatattataTCGGAATGTGGTTAGAGACAACAACGTGACCCTGCCGTGTACCAGCTGAGAGACTCTAAATCCAGTGACAAGTCTG
TCGA-47	GAGATCATGTCCTAACCCTGATCCTCTTGTCCCACAGATATCCAGAACCCTCTAAGAAGTTCCTGCTTCGAtataaatatattatttaGAATGTGGTTAGAGACAACAAGCTGACCCTGCCGTGTACCAGCTGAGAGACTCTAAATCCAGTGACAAGTCTG
TCGA-48	GAGATCATGTCCTAACCCTGATCCTCTTGTCCCACAGATATCCAGAACCCTCTAAGAAGTTCCTGCTtaTCGAtataaatatattattGAATGTGGTTAGAGACAACAAGTTGACCCTGCCGTGTACCAGCTGAGAGACTCTAAATCCAGTGACAAGTCTG
TCGA-49	GAGATCATGTCCTAACCCTGATCCTCTTGTCCCACAGATATCCAGAACCCTCTAAGAAGTTCCTGCTtttaTCGAtataaatatattaGAATGTGGTTAGAGACAACACCATGACCCTGCCGTGTACCAGCTGAGAGACTCTAAATCCAGTGACAAGTCTG
TCGA-50	GAGATCATGTCCTAACCCTGATCCTCTTGTCCCACAGATATCCAGAACCCTCTAAGAAGTTCCTGCTtatttaTCGAtataaatatatGAATGTGGTTAGAGACAACACTGTGACCCTGCCGTGTACCAGCTGAGAGACTCTAAATCCAGTGACAAGTCTG
TCGA-51	GAGATCATGTCCTAACCCTGATCCTCTTGTCCCACAGATATCCAGAACCCTCTAAGAAGTTCCTGCTattatttaTCGAtataaatatGAATGTGGTTAGAGACAACAGTGTGACCCTGCCGTGTACCAGCTGAGAGACTCTAAATCCAGTGACAAGTCTG
TCGA-52	GAGATCATGTCCTAACCCTGATCCTCTTGTCCCACAGATATCCAGAACCCTCTAAGAAGTTCCTGCTatattatttaTCGAtataaatGAATGTGGTTAGAGACAACATAGTGACCCTGCCGTGTACCAGCTGAGAGACTCTAAATCCAGTGACAAGTCTG
TCGA-53	GAGATCATGTCCTAACCCTGATCCTCTTGTCCCACAGATATCCAGAACCCTCTAAGAAGTTCCTGCTatatattatttaTCGAtataaGAATGTGGTTAGAGACAACATCTTGACCCTGCCGTGTACCAGCTGAGAGACTCTAAATCCAGTGACAAGTCTG
TCGA-54	GAGATCATGTCCTAACCCTGATCCTCTTGTCCCACAGATATCCAGAACCCTCTAAGAAGTTCCTGCTaaatatattatttaTCGAtatGAATGTGGTTAGAGACAACCGAATGACCCTGCCGTGTACCAGCTGAGAGACTCTAAATCCAGTGACAAGTCTG
TCGA-55	GAGATCATGTCCTAACCCTGATCCTCTTGTCCCACAGATATCCAGAACCCTCTAAGAAGTTCCTGCTataaatatattatttaTCGAtGAATGTGGTTAGAGACAACCTACTGACCCTGCCGTGTACCAGCTGAGAGACTCTAAATCCAGTGACAAGTCTG
TCGA-56	GAGATCATGTCCTAACCCTGATCCTCTTGTCCCACAGATATCCAGAACCCTCTAAGAAGTTCCTGCTAtataaatatattatttaTCGGAATGTGGTTAGAGACAACCTGATGACCCTGCCGTGTACCAGCTGAGAGACTCTAAATCCAGTGACAAGTCTG
TCGA-57	GAGATCATGTCCTAACCCTGATCCTCTTGTCCCACAGATATCCAGAACCCTCTAAGAAGTTCCTGCTTCGAtattaaatatattaatttaGAATGTGGTTAGAGACAACCTGTTGACCCTGCCGTGTACCAGCTGAGAGACTCTAAATCCAGTGACAAGTCTG
TCGA-58	GAGATCATGTCCTAACCCTGATCCTCTTGTCCCACAGATATCCAGAACCCTCTAAGAAGTTCCTGCTtaTCGAtattaaatatattaattGAATGTGGTTAGAGACAACGAATTGACCCTGCCGTGTACCAGCTGAGAGACTCTAAATCCAGTGACAAGTCTG
TCGA-59	GAGATCATGTCCTAACCCTGATCCTCTTGTCCCACAGATATCCAGAACCCTCTAAGAAGTTCCTGCTtttaTCGAtattaaatatattaaGAATGTGGTTAGAGACAACGGTTTGACCCTGCCGTGTACCAGCTGAGAGACTCTAAATCCAGTGACAAGTCTG
TCGA-60	GAGATCATGTCCTAACCCTGATCCTCTTGTCCCACAGATATCCAGAACCCTCTAAGAAGTTCCTGCTaatttaTCGAtattaaatatattGAATGTGGTTAGAGACAACGTAGTGACCCTGCCGTGTACCAGCTGAGAGACTCTAAATCCAGTGACAAGTCTG
TCGA-61	GAGATCATGTCCTAACCCTGATCCTCTTGTCCCACAGATATCCAGAACCCTCTAAGAAGTTCCTGCTttaatttaTCGAtattaaatataGAATGTGGTTAGAGACAACGTCTTGACCCTGCCGTGTACCAGCTGAGAGACTCTAAATCCAGTGACAAGTCTG
TCGA-62	GAGATCATGTCCTAACCCTGATCCTCTTGTCCCACAGATATCCAGAACCCTCTAAGAAGTTCCTGCTtattaatttaTCGAtattaaataGAATGTGGTTAGAGACAACGTTATGACCCTGCCGTGTACCAGCTGAGAGACTCTAAATCCAGTGACAAGTCTG
TCGA-63	GAGATCATGTCCTAACCCTGATCCTCTTGTCCCACAGATATCCAGAACCCTCTAAGAAGTTCCTGCTtatattaatttaTCGAtattaaaGAATGTGGTTAGAGACAACTACTTGACCCTGCCGTGTACCAGCTGAGAGACTCTAAATCCAGTGACAAGTCTG
TCGA-64	GAGATCATGTCCTAACCCTGATCCTCTTGTCCCACAGATATCCAGAACCCTCTAAGAAGTTCCTGCTaatatattaatttaTCGAtattaGAATGTGGTTAGAGACAACTCAATGACCCTGCCGTGTACCAGCTGAGAGACTCTAAATCCAGTGACAAGTCTG
TCGA-65	GAGATCATGTCCTAACCCTGATCCTCTTGTCCCACAGATATCCAGAACCCTCTAAGAAGTTCCTGCTtaaatatattaatttaTCGAtatGAATGTGGTTAGAGACAACTCTGTGACCCTGCCGTGTACCAGCTGAGAGACTCTAAATCCAGTGACAAGTCTG
TCGA-66	GAGATCATGTCCTAACCCTGATCCTCTTGTCCCACAGATATCCAGAACCCTCTAAGAAGTTCCTGCTattaaatatattaatttaTCGAtGAATGTGGTTAGAGACAACTGAATGACCCTGCCGTGTACCAGCTGAGAGACTCTAAATCCAGTGACAAGTCTG
TCGA-67	GAGATCATGTCCTAACCCTGATCCTCTTGTCCCACAGATATCCAGAACCCTCTAAGAAGTTCCTGCTAtattaaatatattaatttaTCGGAATGTGGTTAGAGACAACTGATTGACCCTGCCGTGTACCAGCTGAGAGACTCTAAATCCAGTGACAAGTCTG
TCGA-68	GAGATCATGTCCTAACCCTGATCCTCTTGTCCCACAGATATCCAGAACCCTCTAAGAAGTTCCTGCTTCGAtaattaatatattaataaataGAATGTGGTTAGAGACAACTGGATGACCCTGCCGTGTACCAGCTGAGAGACTCTAAATCCAGTGACAAGTCTG
TCGA-69	GAGATCATGTCCTAACCCTGATCCTCTTGTCCCACAGATATCCAGAACCCTCTAAGAAGTTCCTGCTtaTCGAtaattaatatattaataaaGAATGTGGTTAGAGACAACTGTCTGACCCTGCCGTGTACCAGCTGAGAGACTCTAAATCCAGTGACAAGTCTG
TCGA-70	GAGATCATGTCCTAACCCTGATCCTCTTGTCCCACAGATATCCAGAACCCTCTAAGAAGTTCCTGCTaataTCGAtaattaatatattaataGAATGTGGTTAGAGACAACTTGTTGACCCTGCCGTGTACCAGCTGAGAGACTCTAAATCCAGTGACAAGTCTG
TCGA-71	GAGATCATGTCCTAACCCTGATCCTCTTGTCCCACAGATATCCAGAACCCTCTAAGAAGTTCCTGCTtaaataTCGAtaattaatatattaaGAATGTGGTTAGAGACAAGAACCTGACCCTGCCGTGTACCAGCTGAGAGACTCTAAATCCAGTGACAAGTCTG
TCGA-72	GAGATCATGTCCTAACCCTGATCCTCTTGTCCCACAGATATCCAGAACCCTCTAAGAAGTTCCTGCTaataaataTCGAtaattaatatattGAATGTGGTTAGAGACAAGAACGTGACCCTGCCGTGTACCAGCTGAGAGACTCTAAATCCAGTGACAAGTCTG
TCGA-73	GAGATCATGTCCTAACCCTGATCCTCTTGTCCCACAGATATCCAGAACCCTCTAAGAAGTTCCTGCTttaataaataTCGAtaattaatataGAATGTGGTTAGAGACAAGAAGATGACCCTGCCGTGTACCAGCTGAGAGACTCTAAATCCAGTGACAAGTCTG
TCGA-74	GAGATCATGTCCTAACCCTGATCCTCTTGTCCCACAGATATCCAGAACCCTCTAAGAAGTTCCTGCTtattaataaataTCGAtaattaataGAATGTGGTTAGAGACAAGAAGTTGACCCTGCCGTGTACCAGCTGAGAGACTCTAAATCCAGTGACAAGTCTG
TCGA-75	GAGATCATGTCCTAACCCTGATCCTCTTGTCCCACAGATATCCAGAACCCTCTAAGAAGTTCCTGCTtatattaataaataTCGAtaattaaGAATGTGGTTAGAGACAAGAATCTGACCCTGCCGTGTACCAGCTGAGAGACTCTAAATCCAGTGACAAGTCTG
TCGA-76	GAGATCATGTCCTAACCCTGATCCTCTTGTCCCACAGATATCCAGAACCCTCTAAGAAGTTCCTGCTaatatattaataaataTCGAtaattGAATGTGGTTAGAGACAAGACTGTGACCCTGCCGTGTACCAGCTGAGAGACTCTAAATCCAGTGACAAGTCTG
TCGA-77	GAGATCATGTCCTAACCCTGATCCTCTTGTCCCACAGATATCCAGAACCCTCTAAGAAGTTCCTGCTttaatatattaataaataTCGAtaaGAATGTGGTTAGAGACAAGAGAATGACCCTGCCGTGTACCAGCTGAGAGACTCTAAATCCAGTGACAAGTCTG
TCGA-78	GAGATCATGTCCTAACCCTGATCCTCTTGTCCCACAGATATCCAGAACCCTCTAAGAAGTTCCTGCTaattaatatattaataaataTCGAtGAATGTGGTTAGAGACAAGAGAGTGACCCTGCCGTGTACCAGCTGAGAGACTCTAAATCCAGTGACAAGTCTG
TCGA-79	GAGATCATGTCCTAACCCTGATCCTCTTGTCCCACAGATATCCAGAACCCTCTAAGAAGTTCCTGCTAtaattaatatattaataaataTCGGAATGTGGTTAGAGACAAGAGCATGACCCTGCCGTGTACCAGCTGAGAGACTCTAAATCCAGTGACAAGTCTG
TCGA-80	GAGATCATGTCCTAACCCTGATCCTCTTGTCCCACAGATATCCAGAACCCTCTAAGAAGTTCCTGCTTCGAttattaatatataaataattataGAATGTGGTTAGAGACAAGAGCTTGACCCTGCCGTGTACCAGCTGAGAGACTCTAAATCCAGTGACAAGTCTG
TCGA-81	GAGATCATGTCCTAACCCTGATCCTCTTGTCCCACAGATATCCAGAACCCTCTAAGAAGTTCCTGCTtaTCGAttattaatatataaataattaGAATGTGGTTAGAGACAAGAGGATGACCCTGCCGTGTACCAGCTGAGAGACTCTAAATCCAGTGACAAGTCTG
TCGA-82	GAGATCATGTCCTAACCCTGATCCTCTTGTCCCACAGATATCCAGAACCCTCTAAGAAGTTCCTGCTtataTCGAttattaatatataaataatGAATGTGGTTAGAGACAAGATACTGACCCTGCCGTGTACCAGCTGAGAGACTCTAAATCCAGTGACAAGTCTG
TCGA-83	GAGATCATGTCCTAACCCTGATCCTCTTGTCCCACAGATATCCAGAACCCTCTAAGAAGTTCCTGCTattataTCGAttattaatatataaataGAATGTGGTTAGAGACAAGATGCTGACCCTGCCGTGTACCAGCTGAGAGACTCTAAATCCAGTGACAAGTCTG
TCGA-84	GAGATCATGTCCTAACCCTGATCCTCTTGTCCCACAGATATCCAGAACCCTCTAAGAAGTTCCTGCTtaattataTCGAttattaatatataaaGAATGTGGTTAGAGACAAGATGGTGACCCTGCCGTGTACCAGCTGAGAGACTCTAAATCCAGTGACAAGTCTG
TCGA-85	GAGATCATGTCCTAACCCTGATCCTCTTGTCCCACAGATATCCAGAACCCTCTAAGAAGTTCCTGCTaataattataTCGAttattaatatataGAATGTGGTTAGAGACAAGCAAATGACCCTGCCGTGTACCAGCTGAGAGACTCTAAATCCAGTGACAAGTCTG
TCGA-86	GAGATCATGTCCTAACCCTGATCCTCTTGTCCCACAGATATCCAGAACCCTCTAAGAAGTTCCTGCTtaaataattataTCGAttattaatataGAATGTGGTTAGAGACAAGCACTTGACCCTGCCGTGTACCAGCTGAGAGACTCTAAATCCAGTGACAAGTCTG
TCGA-87	GAGATCATGTCCTAACCCTGATCCTCTTGTCCCACAGATATCCAGAACCCTCTAAGAAGTTCCTGCTtataaataattataTCGAttattaataGAATGTGGTTAGAGACAAGCATGTGACCCTGCCGTGTACCAGCTGAGAGACTCTAAATCCAGTGACAAGTCTG
TCGA-88	GAGATCATGTCCTAACCCTGATCCTCTTGTCCCACAGATATCCAGAACCCTCTAAGAAGTTCCTGCTtatataaataattataTCGAttattaaGAATGTGGTTAGAGACAAGCCTTTGACCCTGCCGTGTACCAGCTGAGAGACTCTAAATCCAGTGACAAGTCTG
TCGA-89	GAGATCATGTCCTAACCCTGATCCTCTTGTCCCACAGATATCCAGAACCCTCTAAGAAGTTCCTGCTaatatataaataattataTCGAttattGAATGTGGTTAGAGACAAGCGATTGACCCTGCCGTGTACCAGCTGAGAGACTCTAAATCCAGTGACAAGTCTG
TCGA-90	GAGATCATGTCCTAACCCTGATCCTCTTGTCCCACAGATATCCAGAACCCTCTAAGAAGTTCCTGCTttaatatataaataattataTCGAttaGAATGTGGTTAGAGACAAGCTCATGACCCTGCCGTGTACCAGCTGAGAGACTCTAAATCCAGTGACAAGTCTG
TCGA-91	GAGATCATGTCCTAACCCTGATCCTCTTGTCCCACAGATATCCAGAACCCTCTAAGAAGTTCCTGCTtattaatatataaataattataTCGAtGAATGTGGTTAGAGACAAGCTTATGACCCTGCCGTGTACCAGCTGAGAGACTCTAAATCCAGTGACAAGTCTG
TCGA-92	GAGATCATGTCCTAACCCTGATCCTCTTGTCCCACAGATATCCAGAACCCTCTAAGAAGTTCCTGCTAttattaatatataaataattataTCGGAATGTGGTTAGAGACAAGGAAATGACCCTGCCGTGTACCAGCTGAGAGACTCTAAATCCAGTGACAAGTCTG
TCGA-93	GAGATCATGTCCTAACCCTGATCCTCTTGTCCCACAGATATCCAGAACCCTCTAAGAAGTTCCTGCTTCGAttattaatatataaatatttaaataGAATGTGGTTAGAGACAAGGAAGTGACCCTGCCGTGTACCAGCTGAGAGACTCTAAATCCAGTGACAAGTCTG
TCGA-94	GAGATCATGTCCTAACCCTGATCCTCTTGTCCCACAGATATCCAGAACCCTCTAAGAAGTTCCTGCTtaTCGAttattaatatataaatatttaaaGAATGTGGTTAGAGACAAGGGAATGACCCTGCCGTGTACCAGCTGAGAGACTCTAAATCCAGTGACAAGTCTG
TCGA-95	GAGATCATGTCCTAACCCTGATCCTCTTGTCCCACAGATATCCAGAACCCTCTAAGAAGTTCCTGCTaataTCGAttattaatatataaatatttaGAATGTGGTTAGAGACAAGGTACTGACCCTGCCGTGTACCAGCTGAGAGACTCTAAATCCAGTGACAAGTCTG
TCGA-96	GAGATCATGTCCTAACCCTGATCCTCTTGTCCCACAGATATCCAGAACCCTCTAAGAAGTTCCTGCTtaaataTCGAttattaatatataaatattGAATGTGGTTAGAGACAAGGTTATGACCCTGCCGTGTACCAGCTGAGAGACTCTAAATCCAGTGACAAGTCTG
TCGA-97	GAGATCATGTCCTAACCCTGATCCTCTTGTCCCACAGATATCCAGAACCCTCTAAGAAGTTCCTGCTtttaaataTCGAttattaatatataaataGAATGTGGTTAGAGACAAGGTTGTGACCCTGCCGTGTACCAGCTGAGAGACTCTAAATCCAGTGACAAGTCTG
TCGA-98	GAGATCATGTCCTAACCCTGATCCTCTTGTCCCACAGATATCCAGAACCCTCTAAGAAGTTCCTGCTtatttaaataTCGAttattaatatataaaGAATGTGGTTAGAGACAAGTAACTGACCCTGCCGTGTACCAGCTGAGAGACTCTAAATCCAGTGACAAGTCTG
TCGA-99	GAGATCATGTCCTAACCCTGATCCTCTTGTCCCACAGATATCCAGAACCCTCTAAGAAGTTCCTGCTaatatttaaataTCGAttattaatatataGAATGTGGTTAGAGACAAGTACATGACCCTGCCGTGTACCAGCTGAGAGACTCTAAATCCAGTGACAAGTCTG
TCGA-100	GAGATCATGTCCTAACCCTGATCCTCTTGTCCCACAGATATCCAGAACCCTCTAAGAAGTTCCTGCTtaaatatttaaataTCGAttattaatataGAATGTGGTTAGAGACAAGTACGTGACCCTGCCGTGTACCAGCTGAGAGACTCTAAATCCAGTGACAAGTCTG
TCGA-101	GAGATCATGTCCTAACCCTGATCCTCTTGTCCCACAGATATCCAGAACCCTCTAAGAAGTTCCTGCTtataaatatttaaataTCGAttattaataGAATGTGGTTAGAGACAAGTAGCTGACCCTGCCGTGTACCAGCTGAGAGACTCTAAATCCAGTGACAAGTCTG
TCGA-102	GAGATCATGTCCTAACCCTGATCCTCTTGTCCCACAGATATCCAGAACCCTCTAAGAAGTTCCTGCTtatataaatatttaaataTCGAttattaaGAATGTGGTTAGAGACAAGTCTCTGACCCTGCCGTGTACCAGCTGAGAGACTCTAAATCCAGTGACAAGTCTG
TCGA-103	GAGATCATGTCCTAACCCTGATCCTCTTGTCCCACAGATATCCAGAACCCTCTAAGAAGTTCCTGCTaatatataaatatttaaataTCGAttattGAATGTGGTTAGAGACAAGTCTGTGACCCTGCCGTGTACCAGCTGAGAGACTCTAAATCCAGTGACAAGTCTG
TCGA-104	GAGATCATGTCCTAACCCTGATCCTCTTGTCCCACAGATATCCAGAACCCTCTAAGAAGTTCCTGCTttaatatataaatatttaaataTCGAttaGAATGTGGTTAGAGACAAGTGTGTGACCCTGCCGTGTACCAGCTGAGAGACTCTAAATCCAGTGACAAGTCTG
TCGA-105	GAGATCATGTCCTAACCCTGATCCTCTTGTCCCACAGATATCCAGAACCCTCTAAGAAGTTCCTGCTtattaatatataaatatttaaataTCGAtGAATGTGGTTAGAGACAAGTTAGTGACCCTGCCGTGTACCAGCTGAGAGACTCTAAATCCAGTGACAAGTCTG
TCGA-106	GAGATCATGTCCTAACCCTGATCCTCTTGTCCCACAGATATCCAGAACCCTCTAAGAAGTTCCTGCTAttattaatatataaatatttaaataTCGGAATGTGGTTAGAGACAAGTTCCTGACCCTGCCGTGTACCAGCTGAGAGACTCTAAATCCAGTGACAAGTCTG
TCGA-107	GAGATCATGTCCTAACCCTGATCCTCTTGTCCCACAGATATCCAGAACCCTCTAAGAAGTTCCTGCTTCGAttattaattaataaatatttaaatataGAATGTGGTTAGAGACAAGTTCTTGACCCTGCCGTGTACCAGCTGAGAGACTCTAAATCCAGTGACAAGTCTG
TCGA-108	GAGATCATGTCCTAACCCTGATCCTCTTGTCCCACAGATATCCAGAACCCTCTAAGAAGTTCCTGCTtaTCGAttattaattaataaatatttaaataGAATGTGGTTAGAGACAATAAGCTGACCCTGCCGTGTACCAGCTGAGAGACTCTAAATCCAGTGACAAGTCTG
TCGA-109	GAGATCATGTCCTAACCCTGATCCTCTTGTCCCACAGATATCCAGAACCCTCTAAGAAGTTCCTGCTtataTCGAttattaattaataaatatttaaaGAATGTGGTTAGAGACAATACTCTGACCCTGCCGTGTACCAGCTGAGAGACTCTAAATCCAGTGACAAGTCTG
TCGA-110	GAGATCATGTCCTAACCCTGATCCTCTTGTCCCACAGATATCCAGAACCCTCTAAGAAGTTCCTGCTaatataTCGAttattaattaataaatatttaGAATGTGGTTAGAGACAATCACATGACCCTGCCGTGTACCAGCTGAGAGACTCTAAATCCAGTGACAAGTCTG
TCGA-111	GAGATCATGTCCTAACCCTGATCCTCTTGTCCCACAGATATCCAGAACCCTCTAAGAAGTTCCTGCTtaaatataTCGAttattaattaataaatattGAATGTGGTTAGAGACAATCATCTGACCCTGCCGTGTACCAGCTGAGAGACTCTAAATCCAGTGACAAGTCTG
TCGA-112	GAGATCATGTCCTAACCCTGATCCTCTTGTCCCACAGATATCCAGAACCCTCTAAGAAGTTCCTGCTtttaaatataTCGAttattaattaataaataGAATGTGGTTAGAGACAATCCCTTGACCCTGCCGTGTACCAGCTGAGAGACTCTAAATCCAGTGACAAGTCTG
TCGA-113	GAGATCATGTCCTAACCCTGATCCTCTTGTCCCACAGATATCCAGAACCCTCTAAGAAGTTCCTGCTtatttaaatataTCGAttattaattaataaaGAATGTGGTTAGAGACAATCCGATGACCCTGCCGTGTACCAGCTGAGAGACTCTAAATCCAGTGACAAGTCTG
TCGA-114	GAGATCATGTCCTAACCCTGATCCTCTTGTCCCACAGATATCCAGAACCCTCTAAGAAGTTCCTGCTaatatttaaatataTCGAttattaattaataGAATGTGGTTAGAGACAATCGAATGACCCTGCCGTGTACCAGCTGAGAGACTCTAAATCCAGTGACAAGTCTG
TCGA-115	GAGATCATGTCCTAACCCTGATCCTCTTGTCCCACAGATATCCAGAACCCTCTAAGAAGTTCCTGCTtaaatatttaaatataTCGAttattaattaaGAATGTGGTTAGAGACAATCGGATGACCCTGCCGTGTACCAGCTGAGAGACTCTAAATCCAGTGACAAGTCTG
TCGA-116	GAGATCATGTCCTAACCCTGATCCTCTTGTCCCACAGATATCCAGAACCCTCTAAGAAGTTCCTGCTaataaatatttaaatataTCGAttattaattGAATGTGGTTAGAGACAATCGGTTGACCCTGCCGTGTACCAGCTGAGAGACTCTAAATCCAGTGACAAGTCTG
TCGA-117	GAGATCATGTCCTAACCCTGATCCTCTTGTCCCACAGATATCCAGAACCCTCTAAGAAGTTCCTGCTttaataaatatttaaatataTCGAttattaaGAATGTGGTTAGAGACAATCGTCTGACCCTGCCGTGTACCAGCTGAGAGACTCTAAATCCAGTGACAAGTCTG
TCGA-118	GAGATCATGTCCTAACCCTGATCCTCTTGTCCCACAGATATCCAGAACCCTCTAAGAAGTTCCTGCTaattaataaatatttaaatataTCGAttattGAATGTGGTTAGAGACAATCGTGTGACCCTGCCGTGTACCAGCTGAGAGACTCTAAATCCAGTGACAAGTCTG
TCGA-119	GAGATCATGTCCTAACCCTGATCCTCTTGTCCCACAGATATCCAGAACCCTCTAAGAAGTTCCTGCTttaattaataaatatttaaatataTCGAttaGAATGTGGTTAGAGACAATGACCTGACCCTGCCGTGTACCAGCTGAGAGACTCTAAATCCAGTGACAAGTCTG
TCGA-120	GAGATCATGTCCTAACCCTGATCCTCTTGTCCCACAGATATCCAGAACCCTCTAAGAAGTTCCTGCTtattaattaataaatatttaaatataTCGAtGAATGTGGTTAGAGACAATGACGTGACCCTGCCGTGTACCAGCTGAGAGACTCTAAATCCAGTGACAAGTCTG
TCGA-121	GAGATCATGTCCTAACCCTGATCCTCTTGTCCCACAGATATCCAGAACCCTCTAAGAAGTTCCTGCTAttattaattaataaatatttaaatataTCGGAATGTGGTTAGAGACAATGCCATGACCCTGCCGTGTACCAGCTGAGAGACTCTAAATCCAGTGACAAGTCTG
TCGA-122	GAGATCATGTCCTAACCCTGATCCTCTTGTCCCACAGATATCCAGAACCCTCTAAGAAGTTCCTGCTTCGAttattaattaataaatatttatttaaataGAATGTGGTTAGAGACAATGCTATGACCCTGCCGTGTACCAGCTGAGAGACTCTAAATCCAGTGACAAGTCTG
TCGA-123	GAGATCATGTCCTAACCCTGATCCTCTTGTCCCACAGATATCCAGAACCCTCTAAGAAGTTCCTGCTtaTCGAttattaattaataaatatttatttaaaGAATGTGGTTAGAGACAATGCTTTGACCCTGCCGTGTACCAGCTGAGAGACTCTAAATCCAGTGACAAGTCTG
TCGA-124	GAGATCATGTCCTAACCCTGATCCTCTTGTCCCACAGATATCCAGAACCCTCTAAGAAGTTCCTGCTaataTCGAttattaattaataaatatttatttaGAATGTGGTTAGAGACAATGGACTGACCCTGCCGTGTACCAGCTGAGAGACTCTAAATCCAGTGACAAGTCTG
TCGA-125	GAGATCATGTCCTAACCCTGATCCTCTTGTCCCACAGATATCCAGAACCCTCTAAGAAGTTCCTGCTtaaataTCGAttattaattaataaatatttattGAATGTGGTTAGAGACAATTCACTGACCCTGCCGTGTACCAGCTGAGAGACTCTAAATCCAGTGACAAGTCTG
TCGA-126	GAGATCATGTCCTAACCCTGATCCTCTTGTCCCACAGATATCCAGAACCCTCTAAGAAGTTCCTGCTtttaaataTCGAttattaattaataaatatttaGAATGTGGTTAGAGACAATTCCGTGACCCTGCCGTGTACCAGCTGAGAGACTCTAAATCCAGTGACAAGTCTG
TCGA-127	GAGATCATGTCCTAACCCTGATCCTCTTGTCCCACAGATATCCAGAACCCTCTAAGAAGTTCCTGCTtatttaaataTCGAttattaattaataaatattGAATGTGGTTAGAGACAATTCGATGACCCTGCCGTGTACCAGCTGAGAGACTCTAAATCCAGTGACAAGTCTG
TCGA-128	GAGATCATGTCCTAACCCTGATCCTCTTGTCCCACAGATATCCAGAACCCTCTAAGAAGTTCCTGCTtttatttaaataTCGAttattaattaataaataGAATGTGGTTAGAGACAATTGCATGACCCTGCCGTGTACCAGCTGAGAGACTCTAAATCCAGTGACAAGTCTG
TCGA-129	GAGATCATGTCCTAACCCTGATCCTCTTGTCCCACAGATATCCAGAACCCTCTAAGAAGTTCCTGCTtatttatttaaataTCGAttattaattaataaaGAATGTGGTTAGAGACAATTGCTTGACCCTGCCGTGTACCAGCTGAGAGACTCTAAATCCAGTGACAAGTCTG
TCGA-130	GAGATCATGTCCTAACCCTGATCCTCTTGTCCCACAGATATCCAGAACCCTCTAAGAAGTTCCTGCTaatatttatttaaataTCGAttattaattaataGAATGTGGTTAGAGACACAAATGTGACCCTGCCGTGTACCAGCTGAGAGACTCTAAATCCAGTGACAAGTCTG
TCGA-131	GAGATCATGTCCTAACCCTGATCCTCTTGTCCCACAGATATCCAGAACCCTCTAAGAAGTTCCTGCTtaaatatttatttaaataTCGAttattaattaaGAATGTGGTTAGAGACACAACTTTGACCCTGCCGTGTACCAGCTGAGAGACTCTAAATCCAGTGACAAGTCTG
TCGA-132	GAGATCATGTCCTAACCCTGATCCTCTTGTCCCACAGATATCCAGAACCCTCTAAGAAGTTCCTGCTaataaatatttatttaaataTCGAttattaattGAATGTGGTTAGAGACACAAGATTGACCCTGCCGTGTACCAGCTGAGAGACTCTAAATCCAGTGACAAGTCTG
TCGA-133	GAGATCATGTCCTAACCCTGATCCTCTTGTCCCACAGATATCCAGAACCCTCTAAGAAGTTCCTGCTttaataaatatttatttaaataTCGAttattaaGAATGTGGTTAGAGACACAAGGTTGACCCTGCCGTGTACCAGCTGAGAGACTCTAAATCCAGTGACAAGTCTG
TCGA-134	GAGATCATGTCCTAACCCTGATCCTCTTGTCCCACAGATATCCAGAACCCTCTAAGAAGTTCCTGCTaattaataaatatttatttaaataTCGAttattGAATGTGGTTAGAGACACAATTGTGACCCTGCCGTGTACCAGCTGAGAGACTCTAAATCCAGTGACAAGTCTG
TCGA-135	GAGATCATGTCCTAACCCTGATCCTCTTGTCCCACAGATATCCAGAACCCTCTAAGAAGTTCCTGCTttaattaataaatatttatttaaataTCGAttaGAATGTGGTTAGAGACACACACTTGACCCTGCCGTGTACCAGCTGAGAGACTCTAAATCCAGTGACAAGTCTG
TCGA-136	GAGATCATGTCCTAACCCTGATCCTCTTGTCCCACAGATATCCAGAACCCTCTAAGAAGTTCCTGCTtattaattaataaatatttatttaaataTCGAtGAATGTGGTTAGAGACACACATATGACCCTGCCGTGTACCAGCTGAGAGACTCTAAATCCAGTGACAAGTCTG
TCGA-137	GAGATCATGTCCTAACCCTGATCCTCTTGTCCCACAGATATCCAGAACCCTCTAAGAAGTTCCTGCTAttattaattaataaatatttatttaaataTCGGAATGTGGTTAGAGACACACGTATGACCCTGCCGTGTACCAGCTGAGAGACTCTAAATCCAGTGACAAGTCTG
TCGA-138	GAGATCATGTCCTAACCCTGATCCTCTTGTCCCACAGATATCCAGAACCCTCTAAGAAGTTCCTGCTTCGAttattaatattaataaatatttatttaaataGAATGTGGTTAGAGACACACTAATGACCCTGCCGTGTACCAGCTGAGAGACTCTAAATCCAGTGACAAGTCTG
TCGA-139	GAGATCATGTCCTAACCCTGATCCTCTTGTCCCACAGATATCCAGAACCCTCTAAGAAGTTCCTGCTtaTCGAttattaatattaataaatatttatttaaaGAATGTGGTTAGAGACACACTAGTGACCCTGCCGTGTACCAGCTGAGAGACTCTAAATCCAGTGACAAGTCTG
TCGA-140	GAGATCATGTCCTAACCCTGATCCTCTTGTCCCACAGATATCCAGAACCCTCTAAGAAGTTCCTGCTaataTCGAttattaatattaataaatatttatttaGAATGTGGTTAGAGACACACTCTTGACCCTGCCGTGTACCAGCTGAGAGACTCTAAATCCAGTGACAAGTCTG
TCGA-141	GAGATCATGTCCTAACCCTGATCCTCTTGTCCCACAGATATCCAGAACCCTCTAAGAAGTTCCTGCTtaaataTCGAttattaatattaataaatatttattGAATGTGGTTAGAGACACAGCAATGACCCTGCCGTGTACCAGCTGAGAGACTCTAAATCCAGTGACAAGTCTG
TCGA-142	GAGATCATGTCCTAACCCTGATCCTCTTGTCCCACAGATATCCAGAACCCTCTAAGAAGTTCCTGCTtttaaataTCGAttattaatattaataaatatttaGAATGTGGTTAGAGACACAGCATTGACCCTGCCGTGTACCAGCTGAGAGACTCTAAATCCAGTGACAAGTCTG
TCGA-143	GAGATCATGTCCTAACCCTGATCCTCTTGTCCCACAGATATCCAGAACCCTCTAAGAAGTTCCTGCTtatttaaataTCGAttattaatattaataaatattGAATGTGGTTAGAGACACAGTATTGACCCTGCCGTGTACCAGCTGAGAGACTCTAAATCCAGTGACAAGTCTG
TCGA-144	GAGATCATGTCCTAACCCTGATCCTCTTGTCCCACAGATATCCAGAACCCTCTAAGAAGTTCCTGCTtttatttaaataTCGAttattaatattaataaataGAATGTGGTTAGAGACACAGTCATGACCCTGCCGTGTACCAGCTGAGAGACTCTAAATCCAGTGACAAGTCTG
TCGA-145	GAGATCATGTCCTAACCCTGATCCTCTTGTCCCACAGATATCCAGAACCCTCTAAGAAGTTCCTGCTtatttatttaaataTCGAttattaatattaataaaGAATGTGGTTAGAGACACAGTGATGACCCTGCCGTGTACCAGCTGAGAGACTCTAAATCCAGTGACAAGTCTG
TCGA-146	GAGATCATGTCCTAACCCTGATCCTCTTGTCCCACAGATATCCAGAACCCTCTAAGAAGTTCCTGCTaatatttatttaaataTCGAttattaatattaataGAATGTGGTTAGAGACACAGTGTTGACCCTGCCGTGTACCAGCTGAGAGACTCTAAATCCAGTGACAAGTCTG
TCGA-147	GAGATCATGTCCTAACCCTGATCCTCTTGTCCCACAGATATCCAGAACCCTCTAAGAAGTTCCTGCTtaaatatttatttaaataTCGAttattaatattaaGAATGTGGTTAGAGACACAGTTCTGACCCTGCCGTGTACCAGCTGAGAGACTCTAAATCCAGTGACAAGTCTG
TCGA-148	GAGATCATGTCCTAACCCTGATCCTCTTGTCCCACAGATATCCAGAACCCTCTAAGAAGTTCCTGCTaataaatatttatttaaataTCGAttattaatattGAATGTGGTTAGAGACACATAAGTGACCCTGCCGTGTACCAGCTGAGAGACTCTAAATCCAGTGACAAGTCTG
TCGA-149	GAGATCATGTCCTAACCCTGATCCTCTTGTCCCACAGATATCCAGAACCCTCTAAGAAGTTCCTGCTttaataaatatttatttaaataTCGAttattaataGAATGTGGTTAGAGACACATATGTGACCCTGCCGTGTACCAGCTGAGAGACTCTAAATCCAGTGACAAGTCTG
TCGA-150	GAGATCATGTCCTAACCCTGATCCTCTTGTCCCACAGATATCCAGAACCCTCTAAGAAGTTCCTGCTtattaataaatatttatttaaataTCGAttattaaGAATGTGGTTAGAGACACATCACTGACCCTGCCGTGTACCAGCTGAGAGACTCTAAATCCAGTGACAAGTCTG
TCGA-151	GAGATCATGTCCTAACCCTGATCCTCTTGTCCCACAGATATCCAGAACCCTCTAAGAAGTTCCTGCTaatattaataaatatttatttaaataTCGAttattGAATGTGGTTAGAGACACATCCTTGACCCTGCCGTGTACCAGCTGAGAGACTCTAAATCCAGTGACAAGTCTG
TCGA-152	GAGATCATGTCCTAACCCTGATCCTCTTGTCCCACAGATATCCAGAACCCTCTAAGAAGTTCCTGCTttaatattaataaatatttatttaaataTCGAttaGAATGTGGTTAGAGACACATCGTTGACCCTGCCGTGTACCAGCTGAGAGACTCTAAATCCAGTGACAAGTCTG
TCGA-153	GAGATCATGTCCTAACCCTGATCCTCTTGTCCCACAGATATCCAGAACCCTCTAAGAAGTTCCTGCTtattaatattaataaatatttatttaaataTCGAtGAATGTGGTTAGAGACACATGACTGACCCTGCCGTGTACCAGCTGAGAGACTCTAAATCCAGTGACAAGTCTG
TCGA-154	GAGATCATGTCCTAACCCTGATCCTCTTGTCCCACAGATATCCAGAACCCTCTAAGAAGTTCCTGCTAttattaatattaataaatatttatttaaataTCGGAATGTGGTTAGAGACACATGTATGACCCTGCCGTGTACCAGCTGAGAGACTCTAAATCCAGTGACAAGTCTG
TCGA-155	GAGATCATGTCCTAACCCTGATCCTCTTGTCCCACAGATATCCAGAACCCTCTAAGAAGTTCCTGCTTCGAttaattaatattaataaatatttatttataataGAATGTGGTTAGAGACACATGTGTGACCCTGCCGTGTACCAGCTGAGAGACTCTAAATCCAGTGACAAGTCTG
TCGA-156	GAGATCATGTCCTAACCCTGATCCTCTTGTCCCACAGATATCCAGAACCCTCTAAGAAGTTCCTGCTtaTCGAttaattaatattaataaatatttatttataaGAATGTGGTTAGAGACACATTCTTGACCCTGCCGTGTACCAGCTGAGAGACTCTAAATCCAGTGACAAGTCTG
TCGA-157	GAGATCATGTCCTAACCCTGATCCTCTTGTCCCACAGATATCCAGAACCCTCTAAGAAGTTCCTGCTaataTCGAttaattaatattaataaatatttatttatGAATGTGGTTAGAGACACCAAACTGACCCTGCCGTGTACCAGCTGAGAGACTCTAAATCCAGTGACAAGTCTG
TCGA-158	GAGATCATGTCCTAACCCTGATCCTCTTGTCCCACAGATATCCAGAACCCTCTAAGAAGTTCCTGCTataataTCGAttaattaatattaataaatatttatttGAATGTGGTTAGAGACACCAAAGTGACCCTGCCGTGTACCAGCTGAGAGACTCTAAATCCAGTGACAAGTCTG
TCGA-159	GAGATCATGTCCTAACCCTGATCCTCTTGTCCCACAGATATCCAGAACCCTCTAAGAAGTTCCTGCTttataataTCGAttaattaatattaataaatatttatGAATGTGGTTAGAGACACCAATCTGACCCTGCCGTGTACCAGCTGAGAGACTCTAAATCCAGTGACAAGTCTG
TCGA-160	GAGATCATGTCCTAACCCTGATCCTCTTGTCCCACAGATATCCAGAACCCTCTAAGAAGTTCCTGCTatttataataTCGAttaattaatattaataaatatttGAATGTGGTTAGAGACACCACATTGACCCTGCCGTGTACCAGCTGAGAGACTCTAAATCCAGTGACAAGTCTG
TCGA-161	GAGATCATGTCCTAACCCTGATCCTCTTGTCCCACAGATATCCAGAACCCTCTAAGAAGTTCCTGCTttatttataataTCGAttaattaatattaataaatatGAATGTGGTTAGAGACACCATATTGACCCTGCCGTGTACCAGCTGAGAGACTCTAAATCCAGTGACAAGTCTG
TCGA-162	GAGATCATGTCCTAACCCTGATCCTCTTGTCCCACAGATATCCAGAACCCTCTAAGAAGTTCCTGCTatttatttataataTCGAttaattaatattaataaatGAATGTGGTTAGAGACACCTCATTGACCCTGCCGTGTACCAGCTGAGAGACTCTAAATCCAGTGACAAGTCTG
TCGA-163	GAGATCATGTCCTAACCCTGATCCTCTTGTCCCACAGATATCCAGAACCCTCTAAGAAGTTCCTGCTatatttatttataataTCGAttaattaatattaataaGAATGTGGTTAGAGACACCTTCATGACCCTGCCGTGTACCAGCTGAGAGACTCTAAATCCAGTGACAAGTCTG
TCGA-164	GAGATCATGTCCTAACCCTGATCCTCTTGTCCCACAGATATCCAGAACCCTCTAAGAAGTTCCTGCTaaatatttatttataataTCGAttaattaatattaatGAATGTGGTTAGAGACACCTTGATGACCCTGCCGTGTACCAGCTGAGAGACTCTAAATCCAGTGACAAGTCTG
TCGA-165	GAGATCATGTCCTAACCCTGATCCTCTTGTCCCACAGATATCCAGAACCCTCTAAGAAGTTCCTGCTataaatatttatttataataTCGAttaattaatattaGAATGTGGTTAGAGACACCTTTCTGACCCTGCCGTGTACCAGCTGAGAGACTCTAAATCCAGTGACAAGTCTG
TCGA-166	GAGATCATGTCCTAACCCTGATCCTCTTGTCCCACAGATATCCAGAACCCTCTAAGAAGTTCCTGCTtaataaatatttatttataataTCGAttaattaatatGAATGTGGTTAGAGACACGAAAGTGACCCTGCCGTGTACCAGCTGAGAGACTCTAAATCCAGTGACAAGTCTG
TCGA-167	GAGATCATGTCCTAACCCTGATCCTCTTGTCCCACAGATATCCAGAACCCTCTAAGAAGTTCCTGCTattaataaatatttatttataataTCGAttaattaatGAATGTGGTTAGAGACACGACTATGACCCTGCCGTGTACCAGCTGAGAGACTCTAAATCCAGTGACAAGTCTG
TCGA-168	GAGATCATGTCCTAACCCTGATCCTCTTGTCCCACAGATATCCAGAACCCTCTAAGAAGTTCCTGCTatattaataaatatttatttataataTCGAttaattaGAATGTGGTTAGAGACACGAGTATGACCCTGCCGTGTACCAGCTGAGAGACTCTAAATCCAGTGACAAGTCTG
TCGA-169	GAGATCATGTCCTAACCCTGATCCTCTTGTCCCACAGATATCCAGAACCCTCTAAGAAGTTCCTGCTtaatattaataaatatttatttataataTCGAttaatGAATGTGGTTAGAGACACGATCTTGACCCTGCCGTGTACCAGCTGAGAGACTCTAAATCCAGTGACAAGTCTG
TCGA-170	GAGATCATGTCCTAACCCTGATCCTCTTGTCCCACAGATATCCAGAACCCTCTAAGAAGTTCCTGCTattaatattaataaatatttatttataataTCGAttaGAATGTGGTTAGAGACACGATGTTGACCCTGCCGTGTACCAGCTGAGAGACTCTAAATCCAGTGACAAGTCTG
TCGA-171	GAGATCATGTCCTAACCCTGATCCTCTTGTCCCACAGATATCCAGAACCCTCTAAGAAGTTCCTGCTtaattaatattaataaatatttatttataataTCGAtGAATGTGGTTAGAGACACGGTATTGACCCTGCCGTGTACCAGCTGAGAGACTCTAAATCCAGTGACAAGTCTG
TCGA-172	GAGATCATGTCCTAACCCTGATCCTCTTGTCCCACAGATATCCAGAACCCTCTAAGAAGTTCCTGCTAttaattaatattaataaatatttatttataataTCGGAATGTGGTTAGAGACACGGTTTTGACCCTGCCGTGTACCAGCTGAGAGACTCTAAATCCAGTGACAAGTCTG
TCGA-173	GAGATCATGTCCTAACCCTGATCCTCTTGTCCCACAGATATCCAGAACCCTCTAAGAAGTTCCTGCTTCGAttaattaatattaatttaaatatttatttatataaGAATGTGGTTAGAGACACGTAATTGACCCTGCCGTGTACCAGCTGAGAGACTCTAAATCCAGTGACAAGTCTG
TCGA-174	GAGATCATGTCCTAACCCTGATCCTCTTGTCCCACAGATATCCAGAACCCTCTAAGAAGTTCCTGCTaaTCGAttaattaatattaatttaaatatttatttatatGAATGTGGTTAGAGACACGTATTTGACCCTGCCGTGTACCAGCTGAGAGACTCTAAATCCAGTGACAAGTCTG
TCGA-175	GAGATCATGTCCTAACCCTGATCCTCTTGTCCCACAGATATCCAGAACCCTCTAAGAAGTTCCTGCTataaTCGAttaattaatattaatttaaatatttatttatGAATGTGGTTAGAGACACGTGAATGACCCTGCCGTGTACCAGCTGAGAGACTCTAAATCCAGTGACAAGTCTG
TCGA-176	GAGATCATGTCCTAACCCTGATCCTCTTGTCCCACAGATATCCAGAACCCTCTAAGAAGTTCCTGCTatataaTCGAttaattaatattaatttaaatatttatttGAATGTGGTTAGAGACACGTGTTTGACCCTGCCGTGTACCAGCTGAGAGACTCTAAATCCAGTGACAAGTCTG
TCGA-177	GAGATCATGTCCTAACCCTGATCCTCTTGTCCCACAGATATCCAGAACCCTCTAAGAAGTTCCTGCTttatataaTCGAttaattaatattaatttaaatatttatGAATGTGGTTAGAGACACGTTGATGACCCTGCCGTGTACCAGCTGAGAGACTCTAAATCCAGTGACAAGTCTG
TCGA-178	GAGATCATGTCCTAACCCTGATCCTCTTGTCCCACAGATATCCAGAACCCTCTAAGAAGTTCCTGCTatttatataaTCGAttaattaatattaatttaaatatttGAATGTGGTTAGAGACACGTTGTTGACCCTGCCGTGTACCAGCTGAGAGACTCTAAATCCAGTGACAAGTCTG
TCGA-179	GAGATCATGTCCTAACCCTGATCCTCTTGTCCCACAGATATCCAGAACCCTCTAAGAAGTTCCTGCTttatttatataaTCGAttaattaatattaatttaaatatGAATGTGGTTAGAGACACGTTTCTGACCCTGCCGTGTACCAGCTGAGAGACTCTAAATCCAGTGACAAGTCTG
TCGA-180	GAGATCATGTCCTAACCCTGATCCTCTTGTCCCACAGATATCCAGAACCCTCTAAGAAGTTCCTGCTatttatttatataaTCGAttaattaatattaatttaaatGAATGTGGTTAGAGACACTAACCTGACCCTGCCGTGTACCAGCTGAGAGACTCTAAATCCAGTGACAAGTCTG
TCGA-181	GAGATCATGTCCTAACCCTGATCCTCTTGTCCCACAGATATCCAGAACCCTCTAAGAAGTTCCTGCTatatttatttatataaTCGAttaattaatattaatttaaGAATGTGGTTAGAGACACTAACGTGACCCTGCCGTGTACCAGCTGAGAGACTCTAAATCCAGTGACAAGTCTG
TCGA-182	GAGATCATGTCCTAACCCTGATCCTCTTGTCCCACAGATATCCAGAACCCTCTAAGAAGTTCCTGCTaaatatttatttatataaTCGAttaattaatattaatttGAATGTGGTTAGAGACACTACTGTGACCCTGCCGTGTACCAGCTGAGAGACTCTAAATCCAGTGACAAGTCTG
TCGA-183	GAGATCATGTCCTAACCCTGATCCTCTTGTCCCACAGATATCCAGAACCCTCTAAGAAGTTCCTGCTttaaatatttatttatataaTCGAttaattaatattaatGAATGTGGTTAGAGACACTAGAGTGACCCTGCCGTGTACCAGCTGAGAGACTCTAAATCCAGTGACAAGTCTG
TCGA-184	GAGATCATGTCCTAACCCTGATCCTCTTGTCCCACAGATATCCAGAACCCTCTAAGAAGTTCCTGCTatttaaatatttatttatataaTCGAttaattaatattaGAATGTGGTTAGAGACACTAGCATGACCCTGCCGTGTACCAGCTGAGAGACTCTAAATCCAGTGACAAGTCTG
TCGA-185	GAGATCATGTCCTAACCCTGATCCTCTTGTCCCACAGATATCCAGAACCCTCTAAGAAGTTCCTGCTtaatttaaatatttatttatataaTCGAttaattaatatGAATGTGGTTAGAGACACTAGTTTGACCCTGCCGTGTACCAGCTGAGAGACTCTAAATCCAGTGACAAGTCTG
TCGA-186	GAGATCATGTCCTAACCCTGATCCTCTTGTCCCACAGATATCCAGAACCCTCTAAGAAGTTCCTGCTattaatttaaatatttatttatataaTCGAttaattaatGAATGTGGTTAGAGACACTATCCTGACCCTGCCGTGTACCAGCTGAGAGACTCTAAATCCAGTGACAAGTCTG
TCGA-187	GAGATCATGTCCTAACCCTGATCCTCTTGTCCCACAGATATCCAGAACCCTCTAAGAAGTTCCTGCTatattaatttaaatatttatttatataaTCGAttaattaGAATGTGGTTAGAGACACTATGATGACCCTGCCGTGTACCAGCTGAGAGACTCTAAATCCAGTGACAAGTCTG
TCGA-188	GAGATCATGTCCTAACCCTGATCCTCTTGTCCCACAGATATCCAGAACCCTCTAAGAAGTTCCTGCTtaatattaatttaaatatttatttatataaTCGAttaatGAATGTGGTTAGAGACACTCAAATGACCCTGCCGTGTACCAGCTGAGAGACTCTAAATCCAGTGACAAGTCTG
TCGA-189	GAGATCATGTCCTAACCCTGATCCTCTTGTCCCACAGATATCCAGAACCCTCTAAGAAGTTCCTGCTattaatattaatttaaatatttatttatataaTCGAttaGAATGTGGTTAGAGACACTCAAGTGACCCTGCCGTGTACCAGCTGAGAGACTCTAAATCCAGTGACAAGTCTG
TCGA-190	GAGATCATGTCCTAACCCTGATCCTCTTGTCCCACAGATATCCAGAACCCTCTAAGAAGTTCCTGCTtaattaatattaatttaaatatttatttatataaTCGAtGAATGTGGTTAGAGACACTCTAATGACCCTGCCGTGTACCAGCTGAGAGACTCTAAATCCAGTGACAAGTCTG
TCGA-191	GAGATCATGTCCTAACCCTGATCCTCTTGTCCCACAGATATCCAGAACCCTCTAAGAAGTTCCTGCTAttaattaatattaatttaaatatttatttatataaTCGGAATGTGGTTAGAGACACTCTAGTGACCCTGCCGTGTACCAGCTGAGAGACTCTAAATCCAGTGACAAGTCTG
